# Supplementary material for: Comparative analysis of organelle genomes provides conflicting evidence between morphological similarity and phylogenetic relationship in diatoms
Source: Frontiers journal article supplement (doi:10.3389/fmars.2023.1283893), 2024-01-03
Supplement: Data_Sheet_1.docx [file Data_Sheet_1.docx]

Supplementary Material

# Supplementary Table (excel)

# Supplementary Figures

# Supplementary Figure 1. Maximum likelihood phylogenetic trees based on 18S rRNA sequences of *Entomoneis umbratica* (MEG002). Bootstrap values below 50% were removed. Unclassified species were excluded from the BLASTn results.

# Supplementary Figure 2. Maximum likelihood phylogenetic trees based on 18S rRNA sequences of *Navicula* *avium* (MEG004). Bootstrap values below 50% were removed. Unclassified species were excluded from the BLASTn results.

**Supplementary Figure 3.** Maximum likelihood phylogenetic trees based on 18S rRNA sequences of *Pleurosigma* *inscriptura* (MEG005). Bootstrap values below 50% were removed. Unclassified species were excluded from the BLASTn results.

**Supplementary Figure 4.** Maximum likelihood phylogenetic trees based on 18S rRNA sequences of *Nitzschia* *reversa* var. *latus* (MEG012), *Nitzschia* *dissipatoides* (MEG028), and *Nitzschia* *anomalus* (MEG011). Bootstrap values below 50% were removed. Unclassified species were excluded from the BLASTn results.

**Supplementary Figure 5.** Phylogenetic tree topologies using organelle genomes at the family level.

**Supplementary Figure 6.** Phylogenetic tree topologies using organelle genomes at the order level.

# Supplementary Reference

# An, S. M., Noh, J. H., Choi, D. H., Lee, J. H., and Yang, E. C. (2016A). Repeat region absent in mitochondrial genome of tube-dwelling diatom *Berkeleya* *fennica* (Naviculales, Bacillariophyceae). *Mitochondrial DNA A: DNA Mapp. Seq. Anal.* 27(3), 2137-2138. doi: 10.3109/19401736.2014.982594

# An, S. M., Noh, J. H., Lee, H. R., Choi, D. H., Lee, J. H., and Yang, E. C. (2016B). Complete mitochondrial genome of biraphid benthic diatom, *Navicula* *ramosissima* (Naviculales, Bacillariophyceae). *Mitochondrial DNA B: Resour.* 1(1), 549-550. doi: 10.1080/23802359.2016.1198997

# An, S. M., Kim, S. Y., Noh, J. H., and Yang, E. C. (2017). Complete mitochondrial genome of *Skeletonema* *marinoi* (Mediophyceae, Bacillariophyta), a clonal chain forming diatom in the west coast of Korea. *Mitochondrial DNA A: DNA Mapp. Seq. Anal.* 28(1), 19-20. doi: 10.3109/19401736.2015.1106523

# Armbrust, E. V., Berges, J. A., Bowler, C., Green, B. R., Martinez, D., Putnam, N. H., et al. (2004). The genome of the diatom *Thalassiosira* *pseudonana*: ecology, evolution, and metabolism. *Science*, 306(5693), 79-86. doi: 10.1126/science.1101156

# Aunins, A. W., Hamilton, D., and King, T. L. (2018). The complete mitochondrial genome of the stalk-forming diatom *Didymosphenia* *geminata*. *Mitochondrial DNA B: Resour.* 3(2), 676-677. doi: 10.1080/23802359.2018.1462669

# Brembu, T., Winge, P., Tooming-Klunderud, A., Nederbragt, A. J., Jakobsen, K. S., and Bones, A. M. (2014). The chloroplast genome of the diatom *Seminavis* *robusta*: new features introduced through multiple mechanisms of horizontal gene transfer. *Mar*. *Genom*. 16, 17-27. doi: 10.1016/j.margen.2013.12.002

# Cao, M., Yuan, X. L., and Bi, G. (2016). Complete sequence and analysis of plastid genomes of *Pseudo*-*nitzschia* *multiseries* (Bacillariophyta). *Mitochondrial DNA A: DNA Mapp. Seq. Anal.* 27(4), 2897-2898. doi: 10.3109/19401736.2015.1060428

# Crowell, R. M., Nienow, J. A., and Cahoon, A. B. (2019). The complete chloroplast and mitochondrial genomes of the diatom *Nitzschia* *palea* (Bacillariophyceae) demonstrate high sequence similarity to the endosymbiont organelles of the dinotom *Durinskia* *baltica*. *J. Phycol*. 55(2), 352-364. doi: 10.1111/jpy.12824352

# Chen, Y., Cui, Z., Liu, F., and Chen, N. (2021A). Mitochondrial genome and phylogenomic analysis of *Pseudo*-*nitzschia* *micropora* (Bacillariophyceae, Bacillariophyta). *Mitochondrial DNA B: Resour.* 6(7), 2035-2037. doi: 10.1080/23802359.2021.1923426

# Chen, Y., Wang, Y., Liu, K., Liu, F., and Chen, N. (2021B). Development of a high-resolution molecular marker for tracking *Pseudo*-*nitzschia* *pungens* genetic diversity through comparative analysis of mitochondrial genomes. *J*. *Appl*. *Phycol*. 33, 2283-2298. doi: doi.org/10.1007/s10811-021-02461-9

# Dąbek, P., Gastineau, R., Bornman, T. G., Lemieux, C., Turmel, M., Hallegraeff, G., et al. (2022). The blue diatom *Haslea* *ostrearia* from the Indian Ocean coast of South Africa, with comparative analysis of *Haslea* organellar genomes. *Front. Mar. Sci.* 9, 950716. doi: 10.3389/fmars.2022.950716

# Galachyants, Y. P., Morozov, A. A., Mardanov, A. V., Beletsky, A. V., Ravin, N. V., Petrova, D. P., et al. (2011). Complete chloroplast genome sequence of freshwater araphid pennate diatom alga *Synedra* *acus* from Lake Baikal. *Int*. *J*. *Biol*. 4(1), 27-35. doi: 10.5539/ijb.v4n1p27

# Gastineau, R., Kim, S. Y., Lemieux, C., Turmel, M., Witkowski, A., Park, J. G., et al. (2019). Complete mitochondrial genome of a rare diatom (Bacillariophyta) *Proschkinia* and its phylogenetic and taxonomic implications. *Mitochondrial DNA B: Resour.* 4(1), 25-26. doi: 10.1080/23802359.2018.1535852

# Gastineau, R., Hamedi, C., Hamed, M. B. B., Abi-Ayad, S. M. E. A., Bąk, M., Lemieux, C., et al. (2021A). Morphological and molecular identification reveals that waters from an isolated oasis in Tamanrasset (extreme South of Algerian Sahara) are colonized by opportunistic and pollution-tolerant diatom species. *Ecol. Indic.*, 121, 107104. doi: 10.1016/j.ecolind.2020.107104

# Gastineau, R., Hansen, G., Poulin, M., Lemieux, C., Turmel, M., Bardeau, J. F., et al. (2021B). *Haslea* *silbo*, a novel cosmopolitan species of blue diatoms. *Biology*, 10(4), 328. doi: 10.3390/biology10040328

# Gastineau, R., Davidovich, N. A., Davidovich, O. I., Lemieux, C., Turmel, M., Wróbel, R. J., et al. (2021C). Extreme enlargement of the inverted repeat region in the plastid genomes of diatoms from the genus *Climaconeis*. *Int. J. Mol. Sci.* 22(13), 7155. doi: 10.3390/ijms22137155

# Gastineau, R., Li, C., Ashworth, M. P., Witkowski, A., Turmel, M., Gorecka, E., et al. (2022). A new insight into *Amicula*, a genus of tiny marine benthic diatoms with the description of two new tropical species and the largest mitogenome known for a stramenopile. *Front*. *Mar*. *Sci*. 9, 941506. doi: 10.3389/fmars.2022.941506

# Guillory, W. X., Onyshchenko, A., Ruck, E. C., Parks, M., Nakov, T., Wickett, N. J., et al. (2018). Recurrent loss, horizontal transfer, and the obscure origins of mitochondrial introns in diatoms (Bacillariophyta). *Genome* *Biol*. *Evol*. 10(6), 1504-1515. doi: 10.1093/gbe/evy103

# Górecka, E., Gastineau, R., Davidovich, N. A., Davidovich, O. I., Ashworth, M. P., Sabir, J. S., et al. (2021). Mitochondrial and plastid genomes of the monoraphid diatom *Schizostauron* *trachyderma*. *Int. J. Mol. Sci.* 22(20), 11139. doi: 10.3390/ijms222011139

# Hamedi, C., Gastineau, R., Lemieux, C., Turmel, M., Witkowski, A., and Baba Hamed, M. B. (2019). Complete chloroplast genome of the diatom *Skeletonema* *pseudocostatum* from the Western Mediterranean coast of Algeria. *Mitochondrial DNA B: Resour*. 4(1), 1091-1092. doi: 10.1080/23802359.2019.1586481

# Hamsher, S. E., Keepers, K. G., Pogoda, C. S., Stepanek, J. G., Kane, N. C., and Kociolek, J. P. (2019). Extensive chloroplast genome rearrangement amongst three closely related *Halamphora* spp.(Bacillariophyceae), and evidence for rapid evolution as compared to land plants. *PLoS One*, 14(7), e0217824. doi: 10.1371/journal.pone.0217824

# Hongo, Y., Kimura, K., Takaki, Y., Yoshida, Y., Baba, S., Kobayashi, G., et al. (2021). The genome of the diatom *Chaetoceros* *tenuissimus* carries an ancient integrated fragment of an extant virus. *Sci*. *Rep*. 11(1), 22877. doi: 10.1038/s41598-021-00565-3

# Huang, H., Song, H., Zhao, Z., Liu, F., and Chen, N. (2021A). Complete mitochondrial genome of *Coscinodiscus* *granii* (Coscinodiscophyceae, Bacillariophyta). *Mitochondrial DNA B: Resour*. 6(8), 2332-2334. doi: 10.1080/23802359.2021.1951135

# Huang, H., Wang, Y., Song, H., Wang, J., Chen, Y., Zhao, Y., et al. (2021B). The complete mitochondrial genome and phylogenetic analysis of *Coscinodiscus* *wailesii* (Coscinodiscophyceae, Bacillariophyta). *Mitochondrial DNA B: Resour*. 6(7), 1849-1851. doi: 10.1080/23802359.2021.1934578

# He, Z., Chen, Y., Wang, Y., Liu, K., Xu, Q., Li, Y., et al. (2022). Comparative analysis of *Pseudo*-*nitzschia* chloroplast genomes revealed extensive inverted region variation and *Pseudo*-*nitzschia* speciation. *Front. Mar. Sci.* 9, 784579. doi: 10.3389/fmars.2022.784579

# Hongo, Y., Kimura, K., Takaki, Y., Yoshida, Y., Baba, S., Kobayashi, G., et al. (2021). The genome of the diatom *Chaetoceros* *tenuissimus* carries an ancient integrated fragment of an extant virus. *Sci. Rep*. 11(1), 22877. doi: 10.1038/s41598-021-00565-3

# Jeong, Y., and Lee, J. (2021). The complete mitochondrial genome of the benthic diatom *Pleurosigma* *inscriptura*. *Mitochondrial DNA B: Resour*., 6(9), 2584-2586. doi: 10.1080/23802359.2021.1945970

# Kamikawa, R., Tanifuji, G., Ishikawa, S. A., Ishii, K. I., Matsuno, Y., Onodera, N. T., et al. (2015). Proposal of a twin aarginine translocator system-mediated constraint against loss of ATP synthase genes from nonphotosynthetic plastid genomes. *Mol*. *Biol*. *Evol*. 32(10), 2598-2604. doi: 10.1093/molbev/msv134

# Kamikawa, R., Azuma, T., Ishii, K. I., Matsuno, Y., and Miyashita, H. (2018). Diversity of organellar genomes in non-photosynthetic diatoms. *Protist*, 169(3), 351-361.doi: 10.1016/j.protis.2018.04.009

# Kamikawa, R., Mochizuki, T., Sakamoto, M., Tanizawa, Y., Nakayama, T., Onuma, R., et al. (2022). Genome evolution of a nonparasitic secondary heterotroph, the diatom *Nitzschia* *putrida*. *Sci*. *Adv*. 8(17), eabi5075. doi: 10.1126/sciadv.abi5075

# Kowallik, K. V., Stoebe, B., Schaffran, I., Kroth-Pancic, P., and Freier, U. (1995). The chloroplast genome of a chlorophyll a+ c-containing alga, *Odontella* *sinensis*. *Plant Mol. Biol. Rep. PLANT MOL BIOL REP*. 13, 336-342. doi: 10.1007/BF02669188

# Li, C., Gastineau, R., Turmel, M., Witkowski, A., Otis, C., Car, A., et al. (2019). Complete chloroplast genome of the tiny marine diatom *Nanofrustulum* *shiloi* (Bacillariophyta) from the Adriatic Sea. *Mitochondrial DNA B: Resour*. 4(2), 3374-3376. doi: 10.1080/23802359.2019.1673245

# Li, D., He, Y., Zhang, L., Wang, F., Qu, C., and Miao, J. (2020). The complete chloroplast genome of *Phaeodactylum* *tricornutum* ICE-H isolated from the Antarctic sea ice. *Mitochondrial DNA B: Resour,* 5(2), 1182-1183. doi: 10.1080/23802359.2020.1731340

# Li, Y., Zhang, X., Zeng, R., and Deng, X. (2021). Characterization of chloroplast genome of the marine diatom *Chaetoceros* *gracilis*. *Mitochondrial DNA B: Resour*. 6(11), 3159-3161. doi: 10.1080/23802359.2021.1987171

# Liu, F., Wang, Y., Huang, H., and Chen, N. (2023). Evolutionary dynamics of plastomes in coscinodiscophycean diatoms revealed by comparative genomics. *Front. Microbiol.* 14, 1203780. doi: 10.3389/fmicb.2023.1203780

# Liu, K., Chen, Y., Cui, Z., Liu, S., Xu, Q., and Chen, N. (2021A). Comparative analysis of chloroplast genomes of *Thalassiosira* species. *Front*. *Mar*. *Sci*. 8, 788307. doi: 10.3389/fmars.2021.788307

# Liu, K., Liu, S., Chen, Y., Liu, F., and Chen, N. (2021B). Complete mitochondrial genome of the harmful algal bloom species *Thalassiosira* *nordenskioeldii* (Mediophyceae, Bacillariophyta) from the East China Sea. *Mitochondrial DNA B: Resour*. 6(4), 1421-1423. doi: 10.1080/23802359.2021.1911715

# Liu, K., Liu, S., Chen, Y., Liu, F., Zhao, Y., and Chen, N. (2021C). Complete mitochondrial genome of *Thalassiosira* *profunda* (Mediophyceae, Bacillariophyta). *Mitochondrial DNA B: Resour*. 6(4), 1560-1562. doi: 10.1080/23802359.2021.1916409

# Liu, S., Xu, Q., Liu, K., Zhao, Y., and Chen, N. (2021D). Chloroplast genomes for five *Skeletonema* species: Comparative and phylogenetic analysis. *Front*. *Plant* *Sci*. 12, 774617. doi: 10.3389/fpls.2021.774617

# Liu, S., Wang, Y., Xu, Q., Zhang, M., and Chen, N. (2021E). Comparative analysis of full-length mitochondrial genomes of five *Skeletonema* species reveals conserved genome organization and recent speciation. *BMC* *Genom*. 22, 1-14. doi: 10.1186/s12864-021-07999-z

# Lommer, M., Roy, A. S., Schilhabel, M., Schreiber, S., Rosenstiel, P., and LaRoche, J. (2010). Recent transfer of an iron-regulated gene from the plastid to the nuclear genome in an oceanic diatom adapted to chronic iron limitation. *BMC* *Genom*., 11, 1-13. doi: 10.1186/1471-2164-11-718

# Mou, S., Zhang, Z., Zhao, H., Nair, S., Li, Y., Xu, K., et al. (2022). A dark‐tolerant diatom (Chaetoceros) cultured from the deep sea. *J*. *Phycol*. 58(2), 208-218. doi: 10.1111/jpy.13240

# Oliver, A., Podell, S., Pinowska, A., Traller, J. C., Smith, S. R., McClure, R., et al. (2021). Diploid genomic architecture of *Nitzschia* *inconspicua*, an elite biomass production diatom. *Sci. Rep*. 11(1), 15592. doi: 10.1038/s41598-021-95106-3

# Oudot-Le Secq, M. P., Grimwood, J., Shapiro, H., Armbrust, E. V., Bowler, C., and Green, B. R. (2007). Chloroplast genomes of the diatoms *Phaeodactylum* *tricornutum* and *Thalassiosira* *pseudonana*: comparison with other plastid genomes of the red lineage. *Mol*. *Genet*. *Genom*., 277, 427-439. doi: 10.1007/s00438-006-0199-4

# Oudot-Le Secq, M. P., and Green, B. R. (2011). Complex repeat structures and novel features in the mitochondrial genomes of the diatoms *Phaeodactylum* *tricornutum* and *Thalassiosira* *pseudonana*. *Gene*, 476(1-2), 20-26. doi: 10.1016/j.gene.2011.02.001

# Pogoda, C. S., Keepers, K. G., Hamsher, S. E., Stepanek, J. G., Kane, N. C., and Kociolek, J. P. (2019). Comparative analysis of the mitochondrial genomes of six newly sequenced diatoms reveals group II introns in the barcoding region of cox1. *Mitochondrial DNA A: DNA Mapp. Seq. Anal.* 30(1), 43-51. doi: 10.1080/24701394.2018.1450397

# Prasetiya, F. S., Gastineau, R., Poulin, M., Lemieux, C., Turmel, M., Syakti, A. D., et al. (2019). *Haslea* *nusantara* (Bacillariophyceae), a new blue diatom from the Java Sea, Indonesia: morphology, biometry and molecular characterization. *Plant Ecol Evol*. 152(2), 188-202. doi: 10.5091/plecevo.2019.1623

# Ravin, N. V., Galachyants, Y. P., Mardanov, A. V., Beletsky, A. V., Petrova, D. P., Sherbakova, et al. (2010). Complete sequence of the mitochondrial genome of a diatom alga *Synedra* *acus* and comparative analysis of diatom mitochondrial genomes. *Curr*. *Genet*. 56, 215-223. doi: 10.1007/s00294-010-0293-3

# Ruck, E. C., Nakov, T., Jansen, R. K., Theriot, E. C., and Alverson, A. J. (2014). Serial gene losses and foreign DNA underlie size and sequence variation in the plastid genomes of diatoms. *Genome Biol. Evol.* 6(3), 644-654. doi: 10.1093/gbe/evu039

# Ruck, E. C., Linard, S. R., Nakov, T., Theriot, E. C., and Alverson, A. J. (2017). Hoarding and horizontal transfer led to an expanded gene and intron repertoire in the plastid genome of the diatom, *Toxarium* *undulatum* (Bacillariophyta). *Curr*. *Genet*., 63, 499-507. doi: /10.1007/s00294-016-0652-9

# Sabir, J. S., Yu, M., Ashworth, M. P., Baeshen, N. A., Baeshen, M. N., Bahieldin, A., et al. (2014). Conserved gene order and expanded inverted repeats characterize plastid genomes of Thalassiosirales. *PLoS* *One*, 9(9), e107854. doi: 10.1371/journal.pone.0107854

# Solak, C. N., Gastineau, R., Lemieux, C., Turmel, M., Gorecka, E., Trobajo, R., et al. (2021). *Nitzschia* *anatoliensis* sp. nov., a cryptic diatom species from the highly alkaline Van Lake (Turkey). *PeerJ*, 9, e12220. doi: 10.7717/peerj.12220

# Tanaka, T., Fukuda, Y., Yoshino, T., Maeda, Y., Muto, M., Matsumoto, M., et al. (2011). High-throughput pyrosequencing of the chloroplast genome of a highly neutral-lipid-producing marine pennate diatom, *Fistulifera* sp. strain JPCC DA0580. *Photosynth*. *Res*. 109, 223-229. doi: 10.1007/s11120-011-9622-8

# Tang, X., and Bi, G. (2016). Complete mitochondrial genome of *Fistulifera* *solaris* (Bacillariophycidae). *Mitochondrial DNA A: DNA Mapp. Seq. Anal.* 27(6), 4405-4406. doi: 10.3109/19401736.2015.1089545

# Villain, A., Kojadinovic, M., Puppo, C., Prioretti, L., Hubert, P., Zhang, Y., et al. (2017). Complete mitochondrial genome sequence of the freshwater diatom *Asterionella* *formosa*. *Mitochondrial DNA B: Resour*. 2(1), 97-98. doi: 10.1080/23802359.2017.1285210

# Wang, Y., Chen, Y., Wang, J., Liu, F., & Chen, N. (2021). Mitochondrial genome of the harmful algal bloom species *Odontella* *regia* (Mediophyceae, Bacillariophyta). *J*. *Appl*. *Phycol*. 33, 855-868. doi: 10.1007/s10811-020-02364-1

# Wang, Y., Wang, J., Chen, Y., Liu, S., Zhao, Y., and Chen, N. (2022A). Comparative analysis of Bacillariophyceae chloroplast genomes uncovers extensive genome rearrangements associated with speciation. *IJEnvH*. 19(16), 10024. doi: 10.3390/ijerph191610024

# Wang, Y., Liu, S., Wang, J., Yao, Y., Chen, Y., Xu, Q., et al. (2022B). Diatom Biodiversity and Speciation Revealed by Comparative Analysis of Mitochondrial Genomes. *Front*. *Plant* *Sci*. 13, 749982. doi: 10.3389/fpls.2022.749982

# Xu, Q., Cui, Z., and Chen, N. (2021). Comparative analysis of chloroplast genomes of seven *Chaetoceros* species revealed variation hotspots and speciation time. *Front*. *Microbiol*. 12, 742554. doi: 10.3389/fmicb.2021.742554

# Yang, F., Feng, C., and Long, L. (2023). The complete chloroplast genome of the marine microalga *Nitzschia* *dubiiformis*. *Mitochondrial DNA B: Resour*. 8(1), 91-94. doi: 10.1080/23802359.2022.2160672

# Yao, Y., Liu, F., and Chen, N. (2021). Complete mitochondrial genome of *Rhizosolenia* *setigera* (Coscinodiscophyceae, Bacillariophyta). *Mitochondrial DNA B: Resour*. 6(8), 2319-2321. doi: 10.1080/23802359.2021.1950059

# Yu, M., Ashworth, M. P., Hajrah, N. H., Khiyami, M. A., Sabir, M. J., Alhebshi, A. M., et al. (2018). Evolution of the plastid genomes in diatoms. *Adv*. *Bot*. *Res*. 85, 129-155. doi: 10.1016/bs.abr.2017.11.009

# Zheng, Z., Chen, H., and Du, N. (2019). Characterization of the complete plastid genome of *Fragilariopsis* *cylindrus*. *Mitochondrial DNA B: Resour*. 4(1), 1138-1139. doi: 10.1080/23802359.2019.1586475

# Zhang, M., Cui, Z., Liu, F., and Chen, N. (2021A). Complete chloroplast genome of *Eucampia* *zodiacus* (Mediophyceae, Bacillariophyta). *Mitochondrial DNA B: Resour*. 6(8), 2194-2197. doi: 10.1080/23802359.2021.1944828

# Zhang, M., Cui, Z., Liu, F., & Chen, N. (2021B). Definition of a high-resolution molecular marker for tracking the genetic diversity of the harmful algal species *Eucampia* *zodiacus* through comparative analysis of mitochondrial genomes. *Front*. *Microbiol*. 12, 631144. doi: 10.3389/fmicb.2021.631144

# Zhang, M. and Chen, N. (2022). Comparative analysis of *Thalassionema* chloroplast genomes revealed hidden biodiversity. *BMC* *Genom*. 23(1), 1-17. doi: 10.1186/s12864-022-08532-6
