# Supplementary material for: Comparative analysis of organelle genomes provides conflicting evidence between morphological similarity and phylogenetic relationship in diatoms
Source: Frontiers journal article supplement (doi:10.3389/fmars.2023.1283893), 2024-01-03
Supplement: Table_1.XLSX [file Table_1.XLSX]

## Sheet: Supplementary Table 1
	Supplementary Table1. Taxon sampling of plastid genomes in diatom species.
	Class	Order	Family	Species	Accession	Reference
	Bacillariophyceae	Bacillariales	Bacillariaceae	Bacillaria paxillifer	NC_061049.1	Wang et al. 2022A
				Cylindrotheca closterium	NC_024082.1	Ruck et al. 2014
				Fragilariopsis cylindrus	NC_045244.1	Zheng et al. 2019
				Psammodictyon constrictum	NC_061048.1	Wang et al. 2022A
				Tryblionella apiculata	NC_056791.1	Gastineau et al. 2021
				Nitzschia dubiiformis	NC_065388.1	Yang et al. 2023
				Nitzschia ovalis	NC_061046.1	Wang et al. 2022A
				Nitzschia supralitorea	NC_056787.1	Gastineau et al. 2021
				Nitzschia traheaformis	NC_061047.1	Wang et al. 2022A
				Nitzschia inconspicua	MW971520.1	Oliver et al. 2021
				Nitzschia anatoliensis	MT742551.1	Solak et al. 2021
				Nitzschia palea	MH113811.1	Crowell et al. 2019
				Pseudo-nitzschia americana	NC_058782.1	He et al. 2022
				Pseudo-nitzschia cuspidata	NC_058785.1	He et al. 2022
				Pseudo-nitzschia delicatissima	NC_058780.1	He et al. 2022
				Pseudo-nitzschia micropora	NC_058781.1	He et al. 2022
				Pseudo-nitzschia multistriata	MW722943.1	He et al. 2022
					NC_058784.1
				Pseudo-nitzschia pungens	NC_058783.1	He et al. 2022
				Pseudo-nitzschia simulans	NC_058786.1	He et al. 2022
				Pseudo-nitzschia sp.	MW853966.1	He et al. 2022
				Pseudo-nitzschia hainanensis	MW853965.1	He et al. 2022
				Pseudo-nitzschia multiseries	MW722945.1	He et al. 2022
					NC_027721.1	Cao et al. 2016
		Cymbellales	Cymbellaceae	Didymosphenia geminata	NC_024083.1	Ruck et al. 2014
			Gomphonemataceae	Gomphonema parvulum	NC_067848.1	-
				Gomphoneis minuta var. cassieae	KY499654.1	-
		Eunotiales	Eunotiaceae	Eunotia naegelii	NC_024928.1	Ruck et al. 2014
		Licmophorales	Ulnariaceae	Ulnaria acus (Synonyms Synedra acus)	NC_016731.1	Galachyants et al. 2011
				Ulnaria ulna	OQ694380.1	-
			Licmophoraceae	Licmophora sp.	MG755795.1	-
		Fragilariales	Staurosiraceae	Nanofrustulum shiloi	MN276191.1	Li et al. 2019
		Naviculales	Amphipleuraceae	Halamphora americana	NC_044463.1	Hamsher et al. 2019
				Halamphora calidilacuna	NC_044464.1	Hamsher et al. 2019
				Halamphora coffeaeformis	NC_044465.1	Hamsher et al. 2019
			Naviculaceae	Navicula avium (Synonyms Haslea avium)	NC_066074.1	Wang et al. 2022A
				Navicula tsukamotoi	OK729588.1	-
				Navicula arenaria	NC_066075.1	Wang et al. 2022A
				Navicula tsukamotoi (Synonyms Haslea tsukamotoi)	NC_066076.1	Wang et al. 2022A
				Navicula veneta	NC_056794.1	Gastineau et al. 2021A
				Haslea karadagensis	NC_067583.1	-
					OK729592.1	-
				Haslea nusantara	NC_044491.1	Prasetiya et al. 2019
				Haslea provincialis	NC_067582.1	-
				Haslea pseudostrearia	NC_067581.1	-
				Haslea silbo	MW645082.1	Gastineau et al. 2021B
				Haslea ostrearia	MW561351.1	Dąbek et al. 2022
				Seminavis robusta	MH356727.1	Brembu et al. 2014
			Pleurosigmataceae	Pleurosigma intermedium	NC_066077.1	Wang et al. 2022A
			Stauroneidaceae	Fistulifera saprophila	NC_056790.1	Gastineau et al. 2021A
				Fistulifera solaris	NC_015403.1	Tanaka et al. 2011
			Stauroneidaceae	Schizostauron trachyderma	MZ520768.1	Górecka et al. 2021
			Diploneidaceae	Amicula micronesica	ON390793.1	Gastineau et al. 2022
				Climaconeis sp.	MZ365053.1	Gastineau et al. 2021C
				Climaconeis cf. scalaris	MZ365054.1	Gastineau et al. 2021C
					MZ365055.1	Gastineau et al. 2021C
		Plagiogrammales	Plagiogrammaceae	Plagiogramma staurophorum	NC_037995.1	Yu et al. 2018
				Psammoneis obaidii	NC_038004.1	Yu et al. 2018
					MG755803.1	Yu et al. 2018
		Rhabdonematales	Tabellariaceae	Asterionella formosa	NC_024079.1	Ruck et al. 2014
		Rhaphoneidales	Asterionellopsidaceae	Asterionellopsis glacialis	NC_024080.1	Ruck et al. 2014
		Surirellales	Entomoneidaceae	Entomoneis sp.	NC_038001.1	Yu et al. 2018
		Thalassionematales	Thalassionemataceae	Thalassionema bacillare	NC_060857.1	Zhang and Chen 2022
				Thalassionema frauenfeldii	NC_060858.1	Zhang and Chen 2022
				Thalassionema nitzschioides	NC_060859.1	Zhang and Chen 2022
		Stephanopyxales	Stephanopyxidaceae	Stephanopyxis turris	NC_069609.1	Liu et al. 2023
	Bacillariophyta classis incertae sedis	Bacillariophyta ordo incertae sedis	Phaeodactylaceae	Phaeodactylum tricornutum	NC_008588.1	Oudot-Le Secq et al. 2007
					MN937452.1	Li et al. 2020
			Bacillariophyta familia incertae sedis	Triceratium dubium (Synonyms Odontella aurita var. minima)	OL855994.1	-
	Coscinodiscophyceae	Coscinodiscales	Hemidiscaceae	Actinocyclus subtilis	NC_038000.1	Yu et al. 2018
			Coscinodiscaceae	Coscinodiscus granii	NC_059930.1	Liu et al. 2023
					MT896721.1	-
				Coscinodiscus radiatus	NC_024081.1	Ruck et al. 2014
				Coscinodiscus wailesii	NC_059929.1	-
		Paraliales	Paraliaceae	Paralia sulcata	NC_069610.1	-
		Rhizosoleniales	Rhizosoleniaceae	Guinardia striata	NC_037998.1	Yu et al. 2018
				Rhizosolenia fallax	NC_038003.1	Liu et al. 2023
				Rhizosolenia imbricata	NC_025311.1	Sabir et al. 2014
				Sundstroemia setigera (Synonyms Rhizosolenia setigera)	MG755793.1	Yu et al. 2018
				Guinardia delicatula	NC_069611.1	Liu et al. 2023
	Mediophyceae	Anaulales	Anaulaceae	Eunotogramma sp.	MG755797.1	Yu et al. 2018
		Ardissoneales	Ardissoneaceae	Toxarium undulatum	NC_031425.1	Ruck et al. 2017
		Biddulphiales	Attheyaceae	Attheya longicornis	NC_037999.1	Yu et al. 2018
			Biddulphiaceae	Biddulphia biddulphiana	NC_038006.1	Yu et al. 2018
				Biddulphia tridens	NC_038007.1	Yu et al. 2018
		Chaetocerotales	Chaetocerotaceae	Acanthoceras zachariasii	NC_038009.1	Yu et al. 2018
				Chaetoceros gelidus	NC_063631.1	-
				Chaetoceros muellerii	NC_053621.1	-
				Chaetoceros simplex	NC_025310.1	Sabir et al. 2014
				Chaetoceros tenuissimus	LC537471.1	Hongo et al. 2021
					MW845778.1	Xu et al.2021
				Chaetoceros gracilis	MZ352931.1	Li et al. 2021
				Chaetoceros sp.	MW660365.1	Mou et al. 2022
				Chaetoceros curvisetus	MW845780.1	Xu et al.2 021
				Chaetoceros laevisporus	MW845779.1	Xu et al.2 021
				Chaetoceros pseudocurvisetus	MW845777.1	Xu et al.2 021
				Chaetoceros socialis	MW845776.1	Xu et al.2 021
				Chaetoceros costatus	MW845775.1	Xu et al.2 021
			Leptocylindraceae	Leptocylindrus danicus	NC_024084.1	Ruck et al. 2014
				Tenuicylindrus belgicus	NC_067957.1	-
		Cymatosirales	Cymatosiraceae	Plagiogrammopsis vanheurckii	NC_037997.1	-
		Eupodiscales	Parodontellaceae	Trieres regia (Synonyms Odontella regia)	NC_067955.1	-
				Trieres chinensis (Synonyms Odontella sinensis)	NC_001713.1	Kowallik et al. 1995
		Hemiaulales	Hemiaulaceae	Cerataulina daemon	NC_025313.1	Sabir et al. 2014
				Eucampia zodiacus	NC_057645.1	Zhang et al. 2021A
				Hemiaulus sinensis	NC_067954.1	-
		Lithodesmiales	Lithodesmiaceae	Ditylum brightwellii	NC_067952.1	-
				Lithodesmioides polymorpha	NC_067953.1	-
				Lithodesmium undulatum	KC509525.1	Ruck et al. 2014
				Helicotheca tamesis	NC_067951.1	-
		Probosciales	Probosciaceae	Proboscia sp.	MG755791.1	Yu et al. 2018
		Stephanodiscales	Stephanodiscaceae	Discostella pseudostelligera (Synonyms Cyclotella pseudostelligera)	NC_038005.1	Yu et al. 2018
					MG755804.1	MG755804.1
				Cyclotella sp.	KJ958481.1	Sabir et al. 2014
					KJ958480.1	Sabir et al. 2014
				Stephanocyclus cryptica (Synonyms Cyclotella cryptica)	MT385839.1	-
				Stephanodiscus niagarae	NC_072630.1	-
		Thalassiosirales	Thalassiosiraceae	Conticribra weissflogii (Synonyms Thalassiosira weissflogii)	NC_025314.1	Sabir et al. 2014
				Minidiscus spinulatus	NC_067956.1	-
				Roundia cardiophora	NC_025312.1	Sabir et al. 2014
				Thalassiosira nordenskioeldii	NC_058877.1	Liu et al. 2021A
				Thalassiosira oceanica	GU323224.1	Lommer et al. 2010
				Thalassiosira profunda	NC_058875.1	Liu et al. 2021A
				Thalassiosira pseudonana	NC_008589.1	Oudot-Le Secq et al. 2007
				Thalassiosira gravida (Synonyms Thalassiosira rotula)	NC_058876.1	Liu et al. 2021A
				Thalassiosira tenera	NC_058878.1	Liu et al. 2021A
				Conticribra weissflogii	MW752443.1	Liu et al. 2021A
				Thalassiosira sp.	MW592700.1	Liu et al. 2021A
			Skeletonemataceae	Skeletonema grevillei	NC_058705.1	Liu et al. 2021D
				Skeletonema marinoi	NC_058701.1	Liu et al. 2021D
				Skeletonema pseudocostatum	NC_058704.1	Liu et al. 2021D
					MK372941.1	Hamedi et al. 2019
				Skeletonema tropicum	NC_058702.1	Liu et al. 2021D
				Skeletonema costatum	NC_058703.1	Liu et al. 2021D
					MW679509.1	Liu et al. 2021D
					OK729593.1	-
		Eupodiscales	Odontellaceae	Pseudictyota dubia (Synonyms Triceratium dubium)	NC_038002.1	Yu et al. 2018

## Sheet: Supplementary Table 2
	Supplementary Table2. Taxon sampling of mitochondrial genomes in diatom species.
	Class	Order	Family	Species	Accession	Reference
	Bacillariophyceae	Bacillariales	Bacillariaceae	Cylindrotheca closterium	NC_037986.1	Guillory et al. 2018
				Nitzschia dissipata	NC_063456.1	Wang et al. 2022B
				Nitzschia inconspicua	MW971521.1	Wang et al. 2022B
				Nitzschia alba	MF997422.1	Pogoda et al. 2019
				Nitzschia ovalis	MW849263.1	Wang et al. 2022B
				Nitzschia palea	MH297491.1	Crowell et al. 2019
					AP018512.1	Kamikawa et al. 2018
				Nitzschia putrida	LC600866.1	Kamikawa et al. 2022
				Nitzschia sp.	AP018509.1	Kamikawa et al. 2018
					AP018510.1	Kamikawa et al. 2015
					AP018507.1	Kamikawa et al. 2018
					AP018505.1	Kamikawa et al. 2018
					MG182051.1	Kamikawa et al. 2018
				Nitzschia supralitorea	NC_056788.1	Gastineau et al. 2021A
				Nitzschia traheaformis	MW849269.1	Wang et al. 2022B
				Pseudo-nitzschia cuspidata	NC_056161.1	-
				Pseudo-nitzschia delicatissima	NC_060304.1	-
				Pseudo-nitzschia micropora	NC_056171.1	Chen et al. 2021A
				Pseudo-nitzschia multiseries	NC_027265.1	-
				Pseudo-nitzschia pungens	NC_057054.1	Chen et al. 2021B
				Tryblionella apiculata	NC_056792.1	Gastineau et al. 2021A
		Cymbellales	Cymbellaceae	Didymosphenia geminata	NC_032171.1	Aunins et al. 2018
			Gomphonemataceae	Gomphonema parvulum	NC_067847.1	-
		Eunotiales	Eunotiaceae	Eunotia naegelii	NC_037987.1	Guillory et al. 2018
		Licmophorales	Ulnariaceae	Ulnaria acus (Synonyms Synedra acus)	NC_013710.1	Ravin et al. 2010
		Naviculales	Berkeleyaceae	Berkeleya fennica	NC_026126.1	An et al. 2016A
			Stauroneidaceae	Fistulifera saprophila	NC_056789.1	Guillory et al. 2018
				Fistulifera solaris	NC_027978.1	Tang and Bi 2016
			Amphipleuraceae	Halamphora coffeaeformis	NC_037727.1	Pogoda et al. 2019
			Naviculaceae	Haslea karadagensis	NC_067580.1	-
				Haslea nusantara	NC_044492.1	Prasetiya et al. 2019
				Haslea ostrearia	ON548138.1	-
				Haslea provincialis	NC_067579.1	-
				Haslea pseudostrearia	NC_067578.1	-
				Navicula ramosissima	NC_031848.1	An et al. 2016B
				Navicula tsukamotoi (Synonyms Haslea tsukamotoi)	MW849268.1	Wang et al. 2022B
					NC_063457.1	Wang et al. 2022B
				Navicula veneta	NC_056793.1	Gastineau et al. 2021A
			Pleurosigmataceae	Pleurosigma inscriptura	NC_059753.1	Jeong and Lee 2021
				Pleurosigma sp.	MW861541.1	Wang et al. 2022B
			Proschkiniaceae	Proschkinia sp.	MH800316.1	Gastineau et al. 2019
			Stauroneidaceae	Schizostauron trachyderma	MZ520767.1	Górecka et al. 2021
		Plagiogrammales	Plagiogrammaceae	Psammoneis japonica	NC_037989.1	Guillory et al. 2018
		Rhabdonematales	Tabellariaceae	Asterionella formosa	NC_032029.1	Villain et al. 2017
		Surirellales	Entomoneidaceae	Entomoneis sp.	MF997419.1	Pogoda et al. 2019
			Surirellaceae	Surirella sp.	MF997423.1	Pogoda et al. 2019
	Bacillariophyta classis incertae sedis	Bacillariophyta ordo incertae sedis	Phaeodactylaceae	Phaeodactylum tricornutum	NC_016739.1	Oudot-Le Secq et al. 2011
	Coscinodiscophyceae	Coscinodiscales	Hemidiscaceae	Actinocyclus sp.	MW413902.1	Wang et al. 2022B
			Coscinodiscaceae	Coscinodiscus granii	NC_060315.1	Huang et al. 2021A
				Coscinodiscus wailesii	MW122841.1	Huang et al. 2021B
		Paraliales	Paraliaceae	Paralia sulcata	MW413901.1	Wang et al. 2022B
		Rhizosoleniales	Rhizosoleniaceae	Guinardia delicatula	MW413905.1	Wang et al. 2022B
				Guinardia striata	MW413904.1	Wang et al. 2022B
				Sundstroemia setigera (Synonyms Rhizosolenia setigera)	NC_059919.1	Yao et al. 2021
		Stephanopyxales	Stephanopyxidaceae	Eupyxidicula turris (Synonyms Stephanopyxis turris)	MW413903.1	Wang et al. 2022B
	Mediophyceae	Ardissoneales	Ardissoneaceae	Toxarium undulatum	NC_037988.1	Guillory et al. 2018
		Chaetocerotales	Chaetocerotaceae	Chaetoceros tenuissimus	LC537470.1	Hongo et al. 2021
		Cymatosirales	Cymatosiraceae	Minutocellus polymorphus	NC_059933.1	-
		Eupodiscales	Odontellaceae	Odontella aurita	NC_063454.1	Wang et al. 2022B
			Parodontellaceae	Trieres regia (Synonyms Odontella regia)	MW018491.1	Wang et al. 2021
		Hemiaulales	Hemiaulaceae	Eucampia zodiacus	NC_054334.1	Zhang et al. 2021B
				Hemiaulus sinensis	NC_063458.1	Wang et al. 2022B
		Lithodesmiales	Lithodesmiaceae	Helicotheca tamesis	NC_063455.1	Wang et al. 2022B
				Lithodesmioides sp.	MW849271.1	Wang et al. 2022B
				Lithodesmium undulatum	NC_056903.1	Wang et al. 2021
		Melosirales	Melosiraceae	Melosira undulata	NC_037728.1	Pogoda et al. 2019
		Thalassiosirales	Skeletonemataceae	Skeletonema grevillei	NC_058789.1	Liu et al. 2021E
				Skeletonema marinoi	KT874463.1	An et al. 2017
				Skeletonema potamos	NC_058792.1	Liu et al. 2021E
				Skeletonema pseudocostatum	NC_058790.1	Liu et al. 2021E
				Skeletonema subsalsum	NC_058791.1	Liu et al. 2021E
				Skeletonema tropicum	NC_058793.1	Liu et al. 2021E
			Thalassiosiraceae	Thalassiosira gravida (Synonyms Thalassiosira rotula)	NC_060383.1	-
				Thalassiosira nordenskioeldii	NC_057471.1	Liu et al. 2021B
				Thalassiosira profunda	NC_056364.1	Liu et al. 2021C
				Thalassiosira pseudonana	NC_007405.1	Armbrust et al. 2004

## Sheet: Supplementary Table 3
	Supplementary Table 3. Morphological characteristics of the genus Entomoneis.
	Species	valve outline	Valve length (μm)	Valve width (μm)	Valve striae in 10 μm	Keel striae in 10 μm	Valvocopula striae in 10 μm	Refrences
	Entomoneis umbratica	linear lanceolate	18 - 32 (n = 100)	8 - 15 (n = 100)	45	45	47	This study
		linear lanceolate	7.2 - 27.0	5.2 - 8.6	40 - 55	40 - 55	55 - 7 0	Mejdandžić et al., 2018
	E. infula	linear lanceolate	16.8 - 27.8	4.9 - 7.2	35 - 50	40 - 55	50 - 60	Mejdandžić et al., 2018
	E. adriatica	linear lanceolate	11.3 - 40.4	4.9 - 8.0	40 - 60	45 - 50	50 - 65	Mejdandžić et al., 2018
	E. punctulata	broadly linear	18 - 99	10 - 19	34 - 36	n/a	n/a	Osada and kobayasi, 1990
	E. tenera	broadly lanceolate	11 - 22	3 - 7	35 - 36	18 - 42	40 - 50	Mejdandžić et al., 2017
	E. gracilis	narrowly lanceolate	13.2 - 36.0	2.2 - 10.0	26 - 37	20 - 39	56 - 60	Mejdandžić et al., 2018
	E. pusilla	lanceolate	9.7 - 14.1	2.3 - 3.8	40 - 55	57 - 60	40 - 45	Mejdandžić et al., 2018
	E. vilicicii	narrowly lanceolate	15.8 - 38.4	3.6 - 9.1	40 - 50	38 - 45	55 - 60	Mejdandžić et al., 2018

## Sheet: Supplementary Table 4
	Supplementary Table 4. Morphological characteristics of the genus Navicula.
	Species	Valve outline	Valve apices	Valve length (μm)	Valve width (μm)	striae in 10 μm	Refrences
	Navicula avium	narrowly lanceolate	acute	20 - 27 (n= 100)	7 – 11 (n = 100)	12	this study
		narrowly lanceolate	acute	32.4 - 62.5	6.0 - 7.8	12 - 14	Li et al., 2017a
	N. babeiensis	narrowly lanceolate with broadly rounded	slightly subrostrate	31.1 - 59.7	5.4 - 6.8	17.0 - 19.1	Kulikovskiy et al., 2021
	N. pseudokuseliana	lanceolate	slightly protracted, subrostrate	59.3 - 68.6	10.3 - 11.4	10.1 - 11.4	Kulikovskiy et al., 2021
	N. coraliana	lanceolate	bluntly rounded, not, or very weakly, protracted	33 - 51	6 - 7	14 - 15	Metzeltin and Lange-Bertalot, 1998; Kulikovskiy et al., 2021
	N. nielsfogedii	linear - elliptic to linear lanceolate	cuneate, more or less obtusely rounded, slightly protracted	22.9 - 43.0	4.7 - 6.7	14 - 18	Taylor et al., 2016; Chudaev et al., 2020; Kulikovskiy et al., 2021
	N. bergstromiana	linear-elliptical to narrowly lanceolate	clearly produced, rostrate	39 - 50	6.5 - 7.5	15 - 16	Sabbe et al., 2019; Kulikovskiy et al., 2021
	N. kuseliana	lanceolate	subrostrate, obtusely rounded	40 - 56	8 - 9	11.5 - 12.5	Rumrich et al., 2000; Kulikovskiy et al., 2021
	N. serotina	lanceolate	short, protracted	43.3 - 79.0	8 - 12	12 - 13	Kulikovskiy et al., 2012; Kulikovskiy et al., 2021
	N. zanonii	lanceolate	weakly rostrate, rather acutely rounded	27 - 60	7 - 11	13 - 14	Hustedt, 1949; Kulikovskiy et al., 2021

## Sheet: Supplementary Table 5
	Supplementary Table 5. Morphological characteristics of the genus Pleurosigma.
	Species	Valve outline	Valve length (μm)	Valve width (μm)	Raphe angle	striae in 10 μm	Refrences
	Pleurosigma inscriptura	lanceolate	104 - 115 (n = 100)	15 - 25 (n = 100)	3.6°	20	Jeong and Lee, 2021
		lanceolate	70 - 132	16 - 21	2.5 - 4°	19.5 - 23	Harper et al., 2009
	P. obtusum	rhombic	126, 131	29, 30	c. 12°	14, 20	Stidolph, 2002; Harper et al., 2009
	P. strigosum	lanceolate	120 - 200	28 - 37	6 - 10°	16 - 18	Sterrenburg, 2003; Harper et al., 2009
	P. rigidum	lanceolate	200 - 360	38 - 45	4 - 8°	17 - 21	Sterrenburg, 2001; Harper et al., 2009
	P. williamsii	lanceolate	90 - 320	15 - 38	c. 5°	18 - 25	Reid, 2002; Harper et al., 2009

## Sheet: Supplementary Table 6
	Supplementary Table 6. Morphological characteristics of Nitzschia reversa var. latus-related taxa.
	Species	Valve length (μm)	Valve width (μm)	Valve outline	Raphe canal	Central nodule	Fibulae in 10 μm (body)	Striae in 10 μm	Poroids in 1 μm	Refrences
	Nitzschia reversa var. latus (MEG012)	38 - 50 (n = 100)	2 - 5 (n = 100)	sigmoid, subrostrate	eccentric	+	11 - 15 (n = 35)	54	7	this study
	Nit. reversa	35 - 75	2.5 - 4.5	sigmoid, rostrate	eccentric	+	14 - 20	n/a	n/a	Smith, 1853
	Nit. droebakensis (synonym of Nit. reversa)	35 - 42	3	sigmoid, rostrate	eccentric	+	16 - 22	60	7 - 8	Hasle, 1964; Giulietti, 2021
	Nit. gobbii	27.0 - 53.1	0.7 - 2.5	linear, rostrate	eccentric	+	2 - 20	72 - 84	n/a	Giulietti, 2021
	Nit. acicularis	ca. 64	4	linear, rostrate	eccentric	-	16 - 20	60	5	Hasle, 1964; Giulietti, 2021
	Nit. Decipiens	32 - 36	2.7	linear, subrostrate	eccentric	-	7 - 9	44	6?	Hasle, 1964; Giulietti, 2021
	Nit. draveillensis	55 - 110	3.5 - 4.5	linear, rostrate	eccentric	+	19 - 21	50 - 60	5	Coste and Ricard, 1980
	Nit. kavirondoensis	32 - 77	2.8 - 3.7	linear, rostrate	eccentric	+	15 - 18	42 - 48	n/a	Sitoki et al., 2013; Giulietti, 2021
	Nit. longissima	ca. 200	6 - 7	linear, rostrate	eccentric	+	10 - 27	52 - 60	6.5 - 7	Hasle and Syvertsen, 1997; Giulietti, 2021
	Nit. ventricosa	100 - 650	9 - 20	n/a	eccentric	+	3 - 10	26 - 27	n/a	Cleve and Grunow, 1880; Giulietti, 2021

## Sheet: Supplementary Table 7
	Supplementary Table 7. Morphological characteristics of Nitzschia dissipatoides-related taxa.
	Species	valve outline	Valve apices	Valve length (μm)	Valve width (μm)	Raphe canal	Central nodule	Fibulae in 10 μm (body)	Striae in 10 μm	Refrences
	Nitzschia dissipatoides	lanceolate with constricted in the middle part	subrostrate rounded apex	21.21 - 30.35 (n = 100)	2.8 - 5.6 (n = 100)	eccentric	+	10	35	this study
				17 - 45	3 - 4.5	eccentric	+	7 - 10	n/a	Archibald, 1982
	Nit. erosa	linear with parallel	slightly square apex	36 - 56	14 - 18	eccentric	n/a	n/a	n/a	Giffen, 1966
	Nit. thienemanni	lanceolate with slightly constricted in the middle part	subrostrate rounded apex	47 - 90	9.5	eccentric	n/a	n/a	20 - 22	Hustedt, 1938
	Nit. fragilariiformis	linear	attenuate and more or less capitate	23 - 43	3 - 4.3	eccentric	+	9 - 12	27 - 30	Compère, 1986
	Nit. hybridaeformis	linear	obliquely rounded	60 - 93	6 - 8	eccentric	n/a	n/a	35	Hustedt, 1955
	Nit. pseudoamphioxys	linear with parallel	tapered, beaked ends	18 - 24	4 - 5	eccentric	n/a	n/a	24	Hustedt, 1942
	Nit. serrata	lanceolate with constricted in the middle part	subrostrate rounded apex	30 - 42	3.5 - 4	eccentric	n/a	n/a	25	Bourrelly et al., 1952
	Nit. yunchengensis	linear with slightly concave in the middle	sharply pointed at the apex	27 - 36	3 - 5.8	n/a	n/a	5 - 9	60	Shu-qi and Ting, 1994
	Nit. albicostalis	lanceolate	subcapitate	23 - 32	4.1 - 4.4	eccentric	+	13 - 17	41 - 42	Li and Volcani, 1987

## Sheet: Supplementary Table 8
	Supplementary Table 8. Morphological characteristics of Nitzschia anomalus-related taxa.
	Species	valve outline	Valve apices	Valve length (μm)	Valve width (μm)	Raphe canal	Fibulae in 10 μm (body)	Striae in 10 μm	Refrences
	Nitzschia anomalus (MEG011)	lanceolate	subrostrate rounded apices	17.69 - 32.97 (n = 100)	4.42 - 7.06 (n = 100)	central	8	37	this study
	Nit. nanodissipata	lanceolate	very slightly set off and acutely rounded apices	15 - 16.5	2.5 - 4	central	8 - 14	50	Witkowski et al., 2016
	Nit. volvendirostrata	spindle shaped with elliptic or lanceolate form	rounded apices	7 - 11.5	3 - 3.5	central	8 - 9	80 -90	Witkowski et al., 2016
	Nit. aestatis	rectangulat-linear with more or less parallel margin	rounded truncate apices	44 - 50	4 - 5	ecentric	12 - 17	44 - 50	Giffen, 1973

## Sheet: Supplementary Table 9
	Supplementary Table 9. General features of plastid and mitochondrial genomes from six diatom species.
			Plastid genome					Mitochondrial genome
	Species name	Strain No.	Size (bp)	rRNA	tRNA	CDS	Accession	Size (bp)	rRNA	tRNA	CDS	Accession
	Entomoneis umbratica	MEG002	128818	6	30	130	OR464352	52741	2	19	34	OR464342
	Navicula avium	MEG004	137373	6	30	128	OR464347	55515	3	23	36	OR464343
	Pleurosigma inscriptura	MEG005	154970	6	30	127	OR464349	38013	2	25	34	NC_059753
	Nitzschia anomalus	MEG011	128514	6	30	132	OR464348	47674	2	24	35	OR464344
	Nitzschia reversa var. latus	MEG012	121172	6	30	130	OR464350	61902	2	23	35	OR464345
	Nitzschia dissipatoides	MEG028	177087	6	31	140	OR464351	36488	2	23	33	OR464346

## Sheet: Supplementary Table 10
	Supplementary Table 10. Plastid gene contents in the Nitzschia clade (yellow boxes: newly predicted genes in this study).
		Pseudo-nitzschia sp. (MW853966)	Pseudo-nitzschia simulans (NC_058786)	Pseudo-nitzschia delicatissima (NC_058780)	Pseudo-nitzschia micropora (NC_058781)	Pseudo-nitzschia cuspidata (NC_058785)	Pseudo-nitzschia sp. (MW853965)	Pseudo-nitzschia multiseries (MW722945)	Pseudo-nitzschia multiseries (NC_027721)	Pseudo-nitzschia pungens (NC_058783)	Pseudo-nitzschia multistriata (MW722943)	Pseudo-nitzschia multistriata (NC_058784)	Pseudo-nitzschia americana (NC_058782)	Fragilariopsis cylindrus (NC_045244)	Nitzschia supralitorea (NC_056787)	Nitzschia inconspicua (MW971520)	Nitzschia ovalis (NC_061046)	Nitzschia alba (NC_044785)	Nitzschia palea (MH113811)	Nitzschia anatoliensis (MT742551)	Nitzschia reversa var. latus (MEG012)	Cylindrotheca closterium (NC_024082)	Tryblionella apiculata (NC_056791)	Nitzschia dubiiformis (NC_065388)	Psammodictyon constrictum (NC_061048)	Nitzschia traheaformis (NC_061047)	Nitzschia dissipatoides (MEG028)	Nitzschia anomalus (MEG011)	Bacillaria paxillifer (NC_061049)
	atpA
	atpB
	atpD
	atpE
	atpF
	atpG
	atpH
	atpI
	bas1															-		-	-	-			-	-	-	-	-	-
	cbbX																	-
	ccsA																	-
	chlI																	-
	clpC
	dnaB																	-
	dnaK
	ftsH																	-
	groEL																	-
	petA																	-
	petB																	-
	petD																	-
	petF															-		-
	petG																	-
	petL																	-
	petM																	-
	petN																	-
	psaA																	-
	psaB																	-
	psaC																	-
	psaD																	-
	psaE	-	-	-	-	-	-	-	-	-	-	-						-
	psaF																	-
	psaI	-	-	-	-	-	-	-	-	-	-	-	-	-				-
	psaJ																	-
	psaL																	-
	psaM																	-
	psbA																	-
	psbB																	-
	psbC																	-
	psbD																	-
	psbE																	-
	psbF																	-
	psbH																	-
	psbI																	-
	psbJ																	-
	psbK																	-
	psbL																	-
	psbN																	-
	psbT																	-
	psbV																	-
	psbW																	-
	psbX																	-
	psbY																	-
	psbZ																	-
	rbcL																	-
	rbcR																	-
	rbcS																	-
	rpl1
	rpl2
	rpl3
	rpl4
	rpl5
	rpl6
	rpl11
	rpl12
	rpl13
	rpl14
	rpl16
	rpl18
	rpl19
	rpl20
	rpl21													-
	rpl22
	rpl23
	rpl24																	-
	rpl27													-
	rpl29
	rpl31
	rpl32
	rpl33
	rpl34
	rpl35
	rpl36						-
	rpoA
	rpoB
	rpoC1/C2
	rps2
	rps3
	rps4
	rps5
	rps6																	-
	rps7
	rps8
	rps9
	rps10
	rps11
	rps12
	rps13
	rps14
	rps16
	rps17
	rps18																	-
	rps19								-
	rps20
	secA
	secG																	-
	secY
	serC	-	-	-	-	-	-	-	-	-	-	-	-	-	-			-	-	-	-	-						-	-
	sufB
	sufC
	syfB	-	-	-	-	-	-	-	-	-	-	-	-	-		-	-	-
	tatC
	thiG																	-
	thiS																	-
	tufA
	tyrC	-	-	-	-	-	-	-	-	-	-	-	-	-	-	-	-	-	-	-	-		-	-	-	-	-	-	-
	ycf3																	-
	ycf4																	-
	ycf12																	-
	ycf33																	-
	ycf35	-	-	-	-	-	-	-	-	-	-	-	-	-			-	-
	ycf39																	-
	ycf41								orf118					orf118		-		-
	ycf45																	-
	ycf46																	-
	ycf66																	-
	ycf88	orf225	orf225	orf225	orf225	orf227	orf224	orf224	orf224	orf224	orf224	orf224	orf224	orf277		HP		-						orf165	-
	ycf89
	ycf90
	ycf91	-	-	-	-	-	-	-	-	-	-	-	-	-	-	-	-	-		-	-	-	-	-	-	-	-	-	-

[truncated: 4 more sheets: Supplementary Table 11, Supplementary Table 12, Supplementary Table 13, Supplementary Table 14]
